# Supplementary material for: Antioxidant and Anti-Inflammatory Effects of 6,3’,4´- and 7,3´,4´-Trihydroxyflavone on 2D and 3D RAW264.7 Models
Source: MDPI journal article supplement (doi:10.3390/antiox12010204), 2023-01-16
Supplement: s1 [file s1]

## Supporting information

### **Antioxidant and Anti-Inflammatory Effects of 6,3',4'- and 7,3',4'-Trihydroxyflavone on 2D and 3D RAW264.7 Models**

#### **1. Resources of Chemicals and Reagents.**

6,3',4'-HOFL and 7,3',4'-HOFL were purchased from INDOFINE Chemical Company, Inc. (USA). Bio-grade DMSO (purity  $\geq 99.9\%$ ), LPS (from *Escherichia coli* serotype 055:B5, purity  $\geq 99\%$ ), c-Src Inhibitor Screening Kit, DCFDA (purity  $\geq 97\%$ ), bisbenzimidazole H33342 (purity  $\geq 97\%$ ) and *t*BHP were purchased from Sigma-Aldrich Co., Ltd. (Singapore). High glucose DMEM, penicillin-streptomycin antibiotics (1,000 IU/ mL penicillin and 1,000  $\mu\text{g/mL}$  streptomycin), FBS, PBS, BCA Protein Assay Kit, RIPA lysis buffer and TRIzol reagent were supplied by Thermo Fisher Scientific Co., Ltd. (Singapore). CCK-8 was purchased from Dojindo Molecular Technologies, Inc. (Kumamoto, Japan). Griess reagent and Gotaq<sup>®</sup> qPCR Master Mix was purchased from Promega Pte Ltd. (Madison, Wisconsin, USA). F-actin staining kit-red fluorescence-Cytopainter was purchased from Abcam (Singapore). Ultralow attachment multi-well

plates were supplied by Corning Inc. (New York, USA). All the antibodies were purchased from Cell Signaling Technology Inc. (Massachusetts, USA). The iScript cDNA synthesis kit, PVDF membranes was supplied by Bio-Rad Laboratories Pte. Ltd. (Singapore). All the primers were purchased from Integrated DNA Technologies Pte. Ltd. (Singapore).

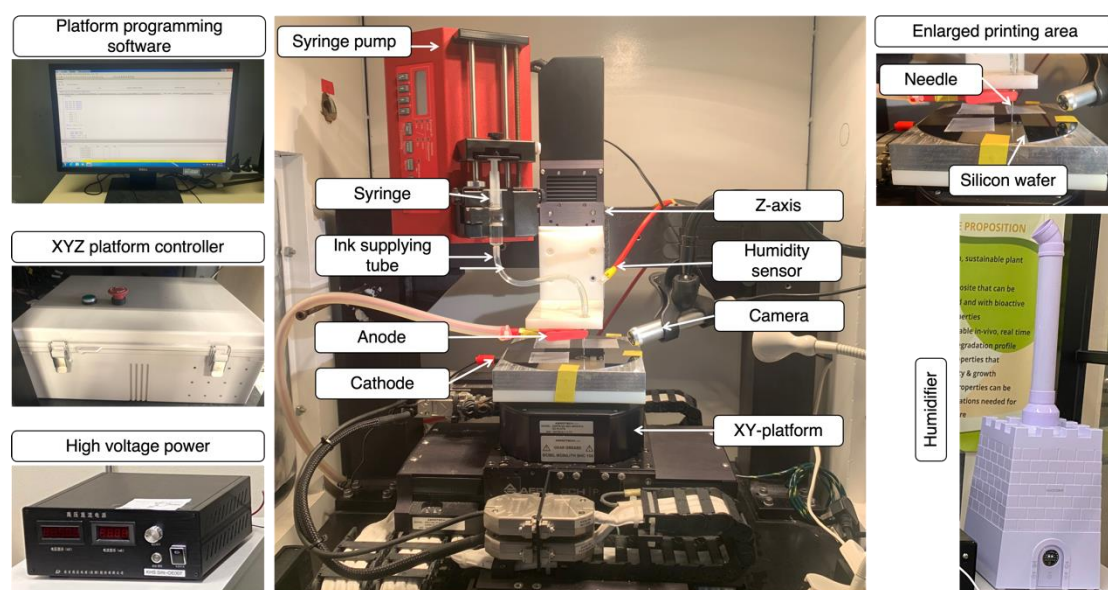

**Figure S1** Picture of homebuilt 3D electrohydrodynamic jetting (EHDJ) printer.

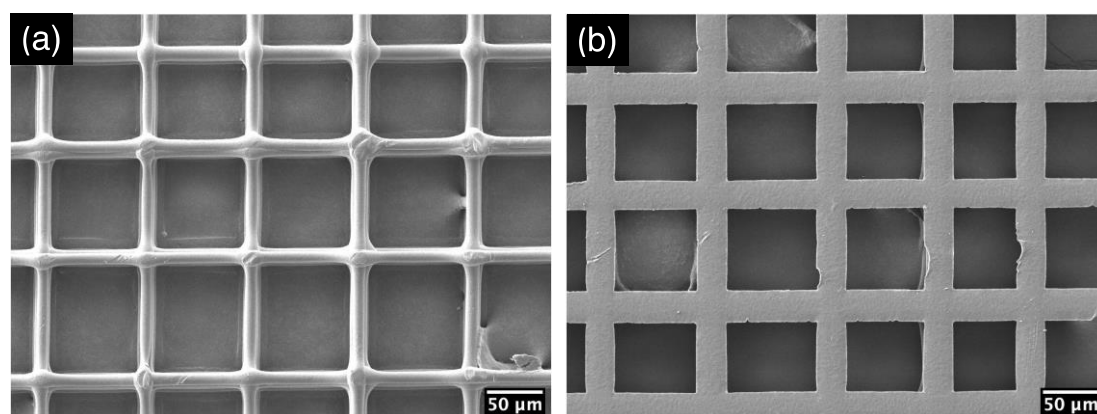

**Figure S2** Scaffolds morphology. Top view (a) and back view (b) of PCL EHDJ-printed scaffolds with 100  $\mu\text{m}$  pore size for 3D cell culturing.

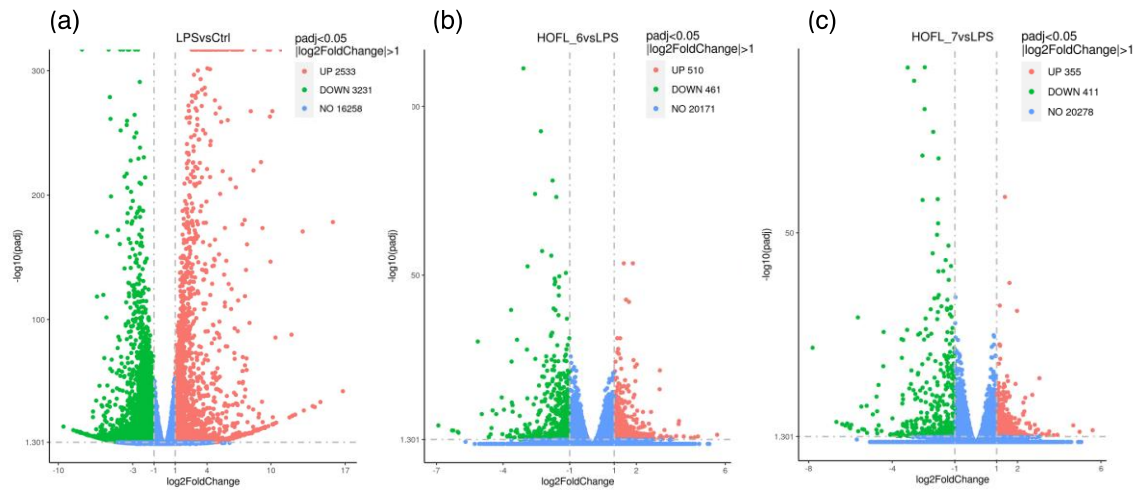

**Figure S3** Volcano plots analysis of differential expression genes (DEGs) in RAW 264.7 cells. LPS stimulation led to 2533 genes upregulated and 3231 genes downregulated (a); 6,3',4'-HOFL treatment led to 461 genes upregulated and 461 genes downregulated in LPS induced inflamed cells (b); 7,3',4'-HOFL treatment led to 355 genes upregulated and 411 genes downregulated in LPS induced inflamed cells (c). Threshold:  $\text{padj} < 0.05$ ,  $|\log_2\text{FoldChange}| > 1$ .

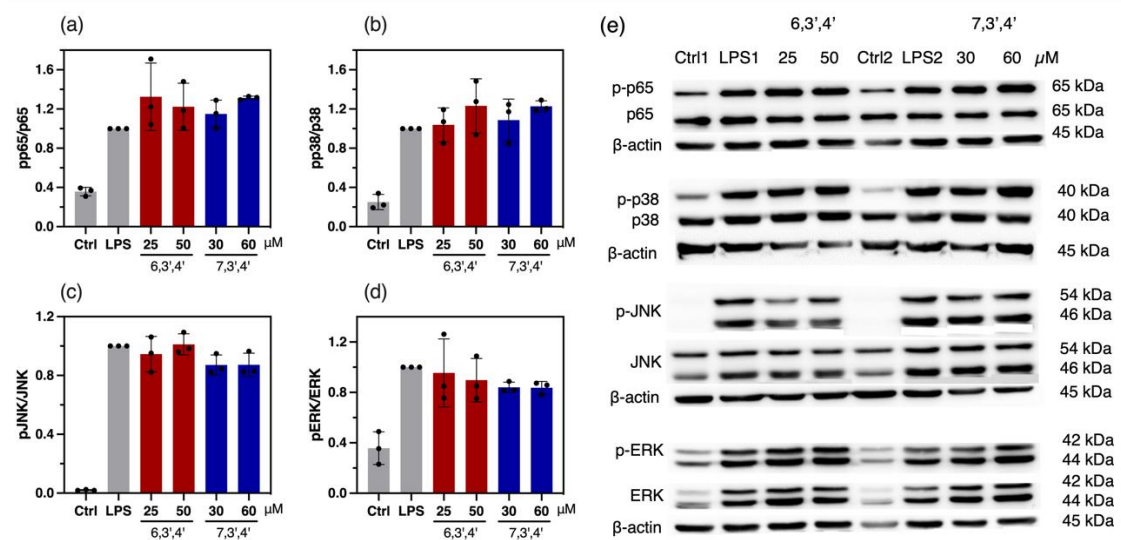

**Figure S4** Protein expression of pp65/p65 (a), pp38/p38 (b), pJNK/JNK (c), pERK/ERK (d), and their bands (e). Data are shown as mean  $\pm$  SD,  $n = 3$ . Each result was triplicated. LPS led to the phosphorylation of p65, p38, ERK and JNK, and pretreatment of 6,3',4'- and 7,3',4'-HOFL showed no effect on their expressions in LPS-induced RAW 264.7 cell line.

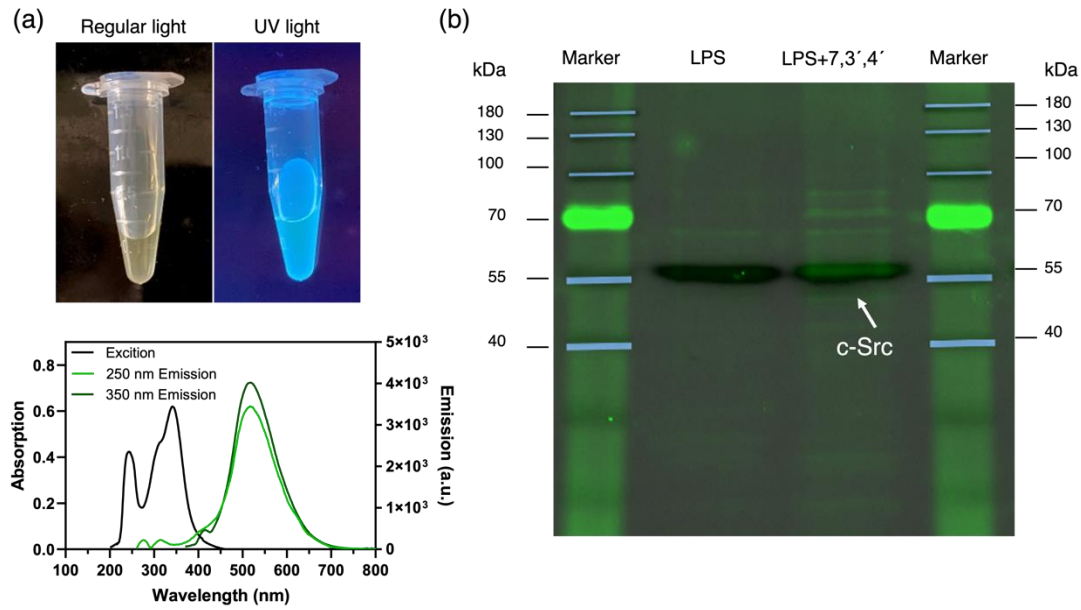

**Figure S5** Application of natural fluorescent 7,3',4'-HOFL for receptor finding. Pictures of 50  $\mu$ M 7,3',4'-HOFL under regular (left) and UV light (right), and its fluorescence spectra (a); merged image of fluorescent gel band and c-Src band on Western blotting membrane (b).

**Table S1** Sequences of primers for RT-qPCR

| Gene           | Forward strand                  | Reverse strand                   |
|----------------|---------------------------------|----------------------------------|
| $\beta$ -actin | 5'-CCACAGCTGAGAGGGAAATC-3',     | 5'-AAGGAAGGCTGGAAAAGAGC-3'       |
| IL-1 $\beta$   | 5'-GGGCCTCAAAGGAAAGAATC-3'      | 5'- TACCAGTTGGGGAACTCTGC-3'      |
| IL-6           | 5'-AGTTGC CTTCTTGGGACTGA-3'     | 5'-CAGAATGCCATTGCACAAC-3'        |
| TNF- $\alpha$  | 5'-AGCCCCCAGTCTGTATCCTT-3'      | 5'-CATTCGAGGCTCCAGTGAAT-3'       |
| Stat5a         | 5'-GACGTGGGCTCCTCACACTGA-3'     | 5'-CGCTGGACTCCATGCTTCTC-3'       |
| Csf2           | 5'-GAGGATGTGGCTGCAGAATTAC-3'    | 5'- CTTCTACCTCTTCATTCAACGTGAC-3' |
| Il2ra          | 5'-GGGAAAACGGGGTGGACTC-3'       | 5'-CTGTGGTGGTTATGGGGCAG-3'       |
| Il13ra2        | 5'-CCGAAATGTTGATAGCGACAGC-3'    | 5'-CCAAGCCCTCATACCAGAAAAAC-3'    |
| Ifnb1          | 5'-GAGCTATTACTGGAGGGTGCAAA-3'   | 5'-ATCTCTGCTCGGACCACCAT-3'       |
| Mmp13          | 5'-GGAGCCACAGATGAGCACAGA-3'     | 5'-TGAACGCTCGCAGTGAAAAG-3'       |
| Mmp3           | 5'-GCCATCTCTTCCATCCAACA-3'      | 5'-CCAGGGTGTGAATGCTTTTA-3'       |
| Ccl17          | 5'-TACCATGAGGTCACCTTCAGA TGC-3' | 5'-GCACTCTCGGCCTACATTGG-3'       |
| Ccl12          | 5'-ATTTCCACACTTCTATGCCTCCT-3'   | 5'-ATCCAGTATGGTCCTGAAGATCA-3'    |

**Table S2** overview of RNA-Sequencing reads

| Sample | Raw reads | Raw bases | Clean reads | Clean bases | Q20   | Q30   | GC_pct |
|--------|-----------|-----------|-------------|-------------|-------|-------|--------|
| Ctrl_1 | 93144302  | 13.97 G   | 91125112    | 13.67 G     | 97.36 | 92.97 | 50.09  |
| Ctrl_2 | 87358694  | 13.1 G    | 85473584    | 12.82 G     | 97.12 | 92.52 | 49.85  |
| Ctrl_3 | 87548506  | 13.13 G   | 85869924    | 12.88 G     | 97.17 | 92.59 | 49.92  |
| LPS_1  | 85680904  | 12.85 G   | 83528966    | 12.53 G     | 97.06 | 92.43 | 49.95  |

|            |          |         |          |         |       |       |       |
|------------|----------|---------|----------|---------|-------|-------|-------|
| LPS_2      | 87404702 | 13.11 G | 85399376 | 12.81 G | 97.24 | 92.83 | 49.98 |
| LPS_3      | 86720560 | 13.01 G | 84936632 | 12.74 G | 97.08 | 92.45 | 50.19 |
| HOFL_634_1 | 87912690 | 13.19 G | 86092230 | 12.91 G | 97.27 | 92.82 | 49.87 |
| HOFL_634_2 | 86939308 | 13.04 G | 84775824 | 12.72 G | 97.26 | 92.84 | 49.79 |
| HOFL_634_3 | 88468112 | 13.27 G | 86490414 | 12.97 G | 97.27 | 92.86 | 50.01 |
| HOFL_734_1 | 88429030 | 13.26 G | 86421576 | 12.96 G | 97.11 | 92.49 | 50.01 |
| HOFL_734_2 | 88488584 | 13.27 G | 85853778 | 12.88 G | 96.93 | 92.09 | 49.85 |
| HOFL_734_3 | 8836541  | 13.25 G | 85770200 | 12.87G  | 97.35 | 93.05 | 50.01 |
